## **Intra- and Inter-individual genetic variation in human ribosomal RNAs**

5

**Artem Babaian**

10 Terry Fox Laboratory, British Columbia Cancer Agency, Vancouver, BC, Canada.  
Department of Medical Genetics, University of British Columbia, Vancouver, BC,  
Canada.

15

20

Artem Babaian

Terry Fox Laboratory

BC Cancer Agency

25 675 West 10<sup>th</sup> Avenue

Vancouver, BC, V5Z1L3, Canada

Email: [ababaian@bccrc.ca](mailto:ababaian@bccrc.ca)

1

## Abstract

The ribosome is an ancient RNA-protein complex essential for translating  
30 DNA to protein. At its core are the ribosomal RNAs (rRNAs), the most abundant  
RNA in the cell. To support high levels of transcription, repetitive arrays of  
ribosomal DNA (rDNA) are necessary and the long-standing hypothesis is that  
they undergo sequence homogenization towards rDNA uniformity.

Here I present evidence of the rich genetic diversity in human rDNA, both  
35 within and between individuals. Using state-of-the-art genome sequencing data  
revealed an average of 192.7 intra-individual variants, including some deeply  
penetrating the rDNA copies, such as the bi-allelically expressed 28S.59A>G.  
From 104 diverse genomes, 947 high-confidence variants were identified and  
unmask a hidden genetic diversity of humans.

40 These findings support the emerging concept that ribosomes are  
heterogeneous within cells and extends the heterogeneity into the realm of  
population genetics. Fundamentally, do our ribosomal variants determine how our  
cells interpret the genome?

45

**Keywords:** Ribosomal Variation, Ribosomal Heterogeneity, Ribosomal DNA,  
Ribosomes, Human Variation

## 50 **Introduction**

The ribosome is an RNA-protein complex essential to all life. This ancient complex translates genetic information into protein. In humans, a mature ribosome contains four structural and catalytic RNA molecules: 18S in the small subunit and 5S, 5.8S and 28S in the large subunit.

55 Ribosomes are highly abundant in cells with ribosomal RNA (rRNA) making up >80% of the RNA in a human cell.(1) To be transcribed to such a high level, the DNA encoding for rRNA (rDNA) is present at ~600 copies per diploid genome. The *RNA45S* gene encodes the 45S pre-rRNA, which is processed and modified into 18S, 5.8S and 28S. The 13.5 kb *RNA45S* gene sits within a 43 kb rDNA repeat,  
60 which in turn are arranged in tandem arrays making up the acrocentric arms of chromosomes 13, 14, 15, 21 and 22. The 5S rRNA gene, *RNA5S*, is found on a tandem-repeated locus at chromosome 1p42.13.(2)

In the initial human genome sequencing project rDNA-containing BACs were systematically depleted since sequencing was expensive and these  
65 repetitive sequences are thought to 'homogenize' into a uniform sequence.(3) Yet notably, in the original research yielding the reference human rDNA, Kuo and colleagues repeatedly cloned and sequenced variants both within and between individuals.(4,5) The variation in these clones localized to 'variable loop regions' and at the time it would have been challenging to distinguish these variants from  
70 pseudogenized rDNA. With recent improvements in sequencing technology, rDNA variation has been increasingly characterized in a diverse collection of species(6-10),so rRNA may not be as homogeneous as previously thought.

Originally I hypothesized that a transposable element could exist within human rDNA (similar to the *Drosophila* R1 and R2 elements(11)) yet would be undetected by standard variant analysis of the human genome. I interrogated human rDNA next-generation sequencing data and 're-discovered' massive intra- and inter-individual sequence heterogeneity in human rDNA, including expressed variants of 18S and 28S.

## Results

### 80 *Intra-individual variation in rDNA*

To measure the intra-individual variation in rDNA, high coverage PCR-free whole genome sequencing data(12) (DNaseq) from the Utah CEPH-1463 trio (daughter, NA12878; father, NA12891; mother, NA12892) was aligned to a reference human rDNA sequence, *hgr1* (see materials and methods and Figure 85 1A).

*hgr1* was covered to an average depth of 8853x (Figure 1B). There are an average of 192.7 (+-14.3) variants per individual at an intra-individual variant allele frequency (iVAF) of greater than 2%. With a 10% iVAF cut-off, there are 85.3 (+- 4.2) variants per individual (Figure 1C). The distribution of the variants is 90 uneven over the different regions of rDNA (Figure 1D). Excluding 5S and 5.8S which were invariable, the density of variation was lower in 18S and 28S at 9.7 variants per kilobase (kb) compared to the other transcribed regions at 15.8 variants per kb, a trend consistent with rDNA variation in other species.(8,10)

As expected, the evolutionary conservation of the mature rRNA variants were 95 at evolutionarily variable regions, such as the expansion loops, or were rare within

individuals. The outlier to this trend is the 28S.59G>A variation, which is both evolutionarily conserved and highly variable within individuals. (Figure 1D).

To test if the variants in the mature rRNA are expressed, poly-A selected RNA sequencing (RNAseq) from the lymphoblastoid cell line GM12878 (derived from NA12878) was analyzed.<sup>(13)</sup> Variants at positions of moderate GC-content could be analyzed such as 28S.59G>A which shows bi-allelic expression. To interrogate a purer rRNA library, K562 total RNAseq (not poly-A selected and not rRNA-depleted) was analyzed with 70.3% of all reads mapping to rDNA, and here too, 28S.59G>A shows bi-allelic expression (Figure 1E).

While inspecting RNAseq libraries, one variant was recurrently observed at the highly conserved 18S.1248T, yet was absent from DNaseq. In the reference RNA, this base is a uradine, but in the mature 18S rRNA, this base is hyper-modified to 1-methyl-3-( $\alpha$ -amino- $\alpha$ -carboxyl-propyl) Pseudouridine (Figure 1E) for its function in the catalytic core of the ribosome's P-site. This hyper-modification hinders reverse transcriptase function<sup>(14)</sup>, thus the “variation” is likely an error profile specific to this modified nucleotide. Besides being interesting, these findings indicate that most standard poly-A selected RNAseq libraries have ‘contaminating’ levels of rRNA which can be used to measure variant rRNA expression in future studies.

#### 115 *Inter-individual variation in rDNA*

To measure if there is rDNA variation between individuals, an additional 104 genomes (four genomes from each of 26 populations)<sup>(15)</sup> were aligned to *hgr1*.

Combined variant discovery (see materials and methods) from all 107  
genomes yielded 947 variants at 926 distinct positions passing quality control ( $p$   
120  $< 0.001$ ) (Figure 2A, Supplementary File 1). 78% of variants are single base  
substitutions favoring GC base changes and the remaining are near-equally  
divided between short insertions and deletions (Figure 2B).

The density of variation across *RNA45S* largely matches the CEPH-1463 trio  
distribution but offers finer resolution of regions absent of variation, notably 5S  
125 and 5.8S, and regions of 18S and 28S. It is important to note that regions of  
extreme GC-content had lower sequencing coverage across the DNaseq libraries,  
and more 'no data' points than moderate-GC regions, something which can be  
addressed with deeper sequencing libraries in the future.

Reasoning that biologically relevant variants, with respect to cell- or tissue-  
130 heterogeneous ribosomes, would be maintained in humans, I quantitatively  
assessed the distribution of the variants in the population (Figure 2C). There is a  
cluster of 23 variants which are both, prevalent in the population, and abundant  
within individuals (population variant-detection frequency (pVDF)  $> 0.5$ , iVAF 0.33  
- 0.66). Alternatively these variants could have had a higher iVAF in human  
135 ancestors, and drift could explain their prevalence and abundance as well. To truly  
measure balancing selection in rDNA, a more complete understanding of its  
heredity is necessary, but these 23 candidate variants warrant priority  
biochemical and molecular analysis (Table 1).

**Table 1: Prevalent and abundant rDNA variants**

| Coordinates (hgr1:) | Region   | Reference Allele | Variant Alleles  | iVAF | sd(iVAF) | pVDF | Variant Calls (N) |
|---------------------|----------|------------------|------------------|------|----------|------|-------------------|
| 1000777             | 5' ETS   | CGG              | C, CGGG, CGGGG   | 0.52 | 0.29     | 0.99 | 94                |
| 1001683             | 5' ETS   | G                | GT               | 0.37 | 0.19     | 0.88 | 83                |
| 1001756             | 5' ETS   | C                | T                | 0.45 | 0.17     | 0.84 | 77                |
| 1001944             | 5' ETS   | G                | C, CGGG          | 0.42 | 0.26     | 0.95 | 97                |
| 1002492             | 5' ETS   | TGCCG            | T                | 0.64 | 0.22     | 0.95 | 74                |
| 1003053             | 5' ETS   | C                | CG               | 0.48 | 0.23     | 0.85 | 51                |
| 1003545             | 5' ETS   | C(CCGT)2         | C(CCGT)1         | 0.4  | 0.19     | 0.76 | 71                |
| 1005721             | 5' ETS   | G                | A                | 0.42 | 0.16     | 0.81 | 83                |
| 1006297             | ITS 1    | C                | A, CTGA          | 0.38 | 0.26     | 0.83 | 60                |
| 1007183             | ITS 2    | (CCGT)1          | (CCGT)2          | 0.42 | 0.19     | 0.93 | 80                |
| 1007812             | ITS 2    | T                | C                | 0.39 | 0.2      | 0.91 | 72                |
| 1007825             | ITS 2    | C                | -                | 0.38 | 0.17     | 0.95 | 76                |
| 1008007             | 28S.59   | G                | A                | 0.39 | 0.17     | 0.99 | 106               |
| 1010121             | 28S.2173 | G                | GC               | 0.34 | 0.32     | 0.77 | 82                |
| 1010123             | 28S.2175 | G                | T, GGT, GCGGGGGT | 0.59 | 0.25     | 0.79 | 84                |
| 1010134             | 28S.2186 | T                | -                | 0.37 | 0.15     | 0.68 | 54                |
| 1010142             | 28S.2194 | GCC              | GC, G            | 0.64 | 0.21     | 0.72 | 51                |
| 1010988             | 28S.3040 | A                | G                | 0.33 | 0.24     | 0.52 | 40                |
| 1010997             | 28S.3049 | C                | CCT, CCTCTCT     | 0.43 | 0.18     | 0.89 | 95                |
| 1011025             | 28S.3077 | C                | T                | 0.37 | 0.23     | 0.56 | 59                |
| 1011106             | 28S.3158 | C                | G, -             | 0.44 | 0.33     | 0.61 | 30                |
| 1013136             | 3' ETS   | T                | G, TG            | 0.51 | 0.27     | 0.8  | 78                |
| 1013422             | IGS      | C                | T                | 0.56 | 0.24     | 0.96 | 75                |

(Prevalent,  $pVDF > 0.5$ ; Abundant,  $0.33 > iVAF > 0.66$ )

Surprisingly, by organizing the 26 human populations into their five super-  
 140 populations, blocks of called variants or even possibly alternative haplotypes  
 emerged (yellow arrows, Figure 2A). These population-uncommon (low pVDF) but  
 intra-individual abundant (higher iVAF) variants (Figure 2C) lends support to the  
 idea that besides intra-individual heterogeneity, there is population-level  
 heterogeneity in rRNA.

145 Altogether, there is substantial intra- and inter-individual variation in human  
rDNA, and these exciting findings raise far more questions than they answer.

## Discussion

The idea that ribosomes are homogenous is increasingly being challenged.  
(16,17) In a land-mark study, knock-out of the murine large sub-unit ribosomal  
150 protein (RP) RPL38 resulted in the specific loss of translation of a set of internal  
ribosomal entry site-dependent HOX genes, but not in global translation.(18,19) In  
a biochemical analysis of RPs in mouse embryonic stem cells, the stoichiometry of  
the different RPs varies between isolated monosomes and polysomes.(20) At the  
transcriptomic level, the relative RP mRNA in yeast varies with growth conditions,  
155 and human RP mRNA varies across tissues,(21) and between normal and  
malignant cells.(22)

These studies have interrogated ribosomal variation at the protein subunit  
and post-transcriptional modification levels.(23) In contrast, the intra-individual  
genetic variation, especially variants present across the populations such as  
160 28S.59G>A, offers an enticing new dimension to intra-cellular or intra-individual  
ribosomal heterogeneity. Since the 'backbone' of the ribosome is the rRNA, it's  
tempting to speculate that differences in the RP-composition and rRNA  
modifications arise from distinct paralogs of *RNA45S*.

The central role of the ribosome to all translation implies that even small  
165 changes to translational efficiency or regulation may have large phenotypic  
consequences. The paramount biological significance of these genes is



underscored by how little we know about their variation in humans or other mammals.

It's relatively straightforward to include rDNA analysis to existing high-throughput DNA- and RNAseq analysis as demonstrated, but further elucidation of how to meaningfully interpret these variants from a population and evolutionary perspective is necessary.

In particular there is a broad class of human genetic diseases called ribosomeopathies, such as Diamond-Blackfan anemia and X-linked dyskeratosis congenita, caused by mutation to ribosomal protein or ribosomal biogenesis factors (reviewed by Nakhoul et al,(24)). Notably, there are no known genetic diseases caused by mutation or variants in nuclear rRNA, but this may be due to the previous perceived difficulty in studying rRNA genes. Yet classical linkage-analysis of an inherited aminoglycoside-induced deafness pedigree led to the identification of a causative mutation in the the 12S mitochondrial rRNA gene, *MTRNR1*.(25)

Intra- and inter-individual heterogeneity of human ribosomal RNA raises fundamental questions about translational variation at three levels; differences amongst individuals or populations in a species; differences between tissues; and differences between each individual ribosome within cells. Ultimately, this study scratches the surface of this topic but to facilitate rapid and open exploration of the consequences of these findings, my laboratory notebooks, data and scripts/methods are unrestrictedly available online (<http://rRNA.ca>). I invite

interested scientists to cooperate in understanding the full implications of this  
190 variation in rRNA and the impact this has on human health.

To date I haven't found evidence for a human rDNA-specific transposable  
element such as R1- or R2.

## Materials and Methods

195 An electronic laboratory notebook is available online (<http://rRNA.ca>) with line-by-line annotated scripts and methods to replicate these experiments in their entirety.

### *Reference Genomes and rDNA repeats*

The 43 kb reference rDNA repeat, U13369.1 was downloaded from NCBI. The  
200 first nucleotide of this sequence is the transcription start site (+1) of the 13.5 kb 45S pre-rRNA, and the last 1 kb is the rDNA upstream promoter region. Initial analyses were hindered by the sequence complexity of the intergenic spacer, so this study focuses on the genic portion of rDNA. PCR-free whole genome sequencing data from CEPH-1463 was aligned to *RNA45S* and its promoter as well  
205 as a single copy of the 5S locus from hg38 (chr1:228744112-228746352). The sequences were manually edited to match the consensus supported by the data, with the reasoning that this represents the common rDNA sequence at each position. Three difficult to align regions were masked with 'N' nucleotides, an AluY element and low complexity sequence in the 5S locus and a simple-repeat  
210 sequence in the ITS1. The resulting sequence, *hgr1*, was used in subsequent analysis {Sequence Accession Pending}.

### *Datasets*

A complete list of sequencing libraries used in this study is available in Supplementary Table 1. Four genomes from each of the 26 human populations  
215 were chosen randomly from the 1000 genomes project data(15). I required paired-

end Illumina sequencing with a minimum of 20 million sequenced fragments per library. On average the libraries used had 67.8 million sequenced fragments.

The evolutionary Shannon information for each mature rRNA base is based on a multiple-sequence alignment of rRNA sequences from all domains of life(26) and  
220 downloaded from the RiboVision suite.(27)

### *Alignment*

Initial alignment parameters were selected to maximize sensitivity. DNaseq alignment was performed with *bowtie2* (28) using the command ``bowtie2 --very-sensitive-local -x hgr1 -1 <read1.fq.gz> -2 <read2.fq.gz>``. The majority of the  
225 alignments were ran on Amazon EC2 using an C4.2xlarge instance. A publicly available instance image with the necessary software and reference genomes is available: '*crown-161229*'.

### *Variant Discovery*

The purpose of this study was to define the major, high frequency variants in  
230 rDNA. Pseudogenized rDNA is a potential source of error in this study, but I reasoned that pseudo-rDNA mutations at identical positions between copies would be rare relative to total rDNA copy number. For variant-discovery, the 107 *hgr1*-aligned bam files were analyzed with the Genome Analysis Toolkit (v.3.6) *HaplotypeCaller* (29) using standard parameters. *HaplotypeCaller* performs local  
235 de-novo assembly over variant positions, which makes it well suited for genotyping rDNA variants. The 926 called variants had an alternative allele quality score of >30 PHRED ( $p < 0.001$ ) and 849 of those variants had a score of

>100 PHRED ( $p < 10^{-10}$ ). The type of substitutions and indel size distribution was plotted with bcftools.(30)

240 This analysis should be interpreted as a conservative, lower bound on rDNA variation. With a larger data-set and more importantly, deeper and less PCR-bias genome sequencing, multi-ploidy variant analysis should yield a more complete set of variants at lower intra-individual variant allele frequencies.

### *Measurements of Variant Allele Frequencies*

245 VCF files were parsed into R with *vcfR* (31) and population statistics calculated with custom scripts. For the interrogated variant positions, intra-individual reference allele frequency was calculated by the number of reference genotype read coverage, divided by the total read coverage used in genotyping. The inverse of the reference allele frequency was defined as the intra-individual  
250 variant allele frequency (iVAF). I calculated iVAF in this way to account for positions with multiple variant alleles and to measure iVAF in genomes where variant alleles may not have been called by the software, yet variant reads were present. The mean intra-individual variant allele frequency is simply the average value of iVAF for each genome in which a variant was present.

255 Inter-individual, or population variant-detection frequency (pVDF) is how many individuals in the population have a measurable variant at a particular position ( $iVAF > 0.02$ ), divided by the total number of individuals in which that position was sequenced. This normalizes for uneven sequencing coverage in the genomes, especially at high-GC regions.

260 The product of iVAF and pVDF therefore, is variant allele frequency in the  
classical sense, taking into account the pool of all rDNA alleles. Although, this  
makes the assumption that rDNA copy number is the same in each individual  
which may not be true. (2,32) As such I have refrained from terming any of the  
variation polymorphisms even though a sub-set (Table 1) are most likely  
265 polymorphisms.

### **Acknowledgements**

I'd like to thank my supervisor Dr. Dixie Mager. Thanks to Katharina Rothe, Andrew  
Chapman, Peter Hurley, Chris Laver and Davide Pellacani for their helpful  
discussions and critical reviews of the manuscript.

270 I was supported by a studentship award from the Natural Sciences and  
Engineering Research Council of Canada. Computing resources were a kind gift  
from hackseq.

## References

1. Adiconis X, Borges-Rivera D, Satija R, DeLuca DS, Busby MA, Berlin AM, et al. Comprehensive comparative analysis of RNA sequencing methods for degraded or low input samples. *Nat Methods*. 2013 Jul;10(7):623–9.
2. Stults DM, Killen MW, Pierce HH, Pierce AJ. Genomic architecture and inheritance of human ribosomal RNA gene clusters. *Genome Res*. 2008 Jan;18(1):13–8.
3. Consortium IHGS. Finishing the euchromatic sequence of the human genome. *Nature*. 2004 Oct 21;431(7011):931–45.
4. Leffers H, Andersen AH. The sequence of 28S ribosomal RNA varies within and between human cell lines. *Nucleic Acids Res*. 1993 Mar 25;21(6):1449–55.
5. Kuo BA, Gonzalez IL, Gillespie DA, Sylvester JE. Human ribosomal RNA variants from a single individual and their expression in different tissues. *Nucleic Acids Res*. 1996 Dec 1;24(23):4817–24.
6. Jensen S, Frost P, Torsvik VL. The nonrandom microheterogeneity of 16S rRNA genes in *Vibrio splendidus* may reflect adaptation to versatile lifestyles. *FEMS Microbiol Lett*. 2009 May;294(2):207–15.
7. Matyášek R, Renny-Byfield S, Fulneček J, Macas J, Grandbastien M-A, Nichols R, et al. Next generation sequencing analysis reveals a relationship between rDNA unit diversity and locus number in *Nicotiana* diploids. *BMC Genomics*. 2012 Dec 23;13:722.
8. Bik HM, Fournier D, Sung W, Bergeron RD, Thomas WK. Intra-Genomic Variation in the Ribosomal Repeats of Nematodes. *PLOS ONE*. 2013 Oct 11;8(10):e78230.
9. Chen J, Miao X, Xu M, He J, Xie Y, Wu X, et al. Intra-Genomic Heterogeneity in 16S rRNA Genes in Strictly Anaerobic Clinical Isolates from Periodontal Abscesses. *PLoS ONE* [Internet]. 2015 Jun 23 [cited 2017 Mar 17];10(6). Available from: <http://www.ncbi.nlm.nih.gov/pmc/articles/PMC4477887/>
10. Wang W, Ma L, Becher H, Garcia S, Kovarikova A, Leitch IJ, et al. Astonishing 35S rDNA diversity in the gymnosperm species *Cycas revoluta* Thunb. *Chromosoma*. 2016;125(4):683–99.
11. Eickbush DG, Eickbush TH. R2 and R2/R1 hybrid non-autonomous retrotransposons derived by internal deletions of full-length elements. *Mob DNA*. 2012;3:10.
12. Eberle MA, Fritzilas E, Krusche P, Källberg M, Moore BL, Bekritsky MA, et al. A reference data set of 5.4 million phased human variants validated by genetic

- inheritance from sequencing a three-generation 17-member pedigree. *Genome Res.* 2017 Jan 1;27(1):157–64.
13. ENCODE Project Consortium. An integrated encyclopedia of DNA elements in the human genome. *Nature.* 2012 Sep 6;489(7414):57–74.
  14. Maden BE, Corbett ME, Heeney PA, Pugh K, Ajuh PM. Classical and novel approaches to the detection and localization of the numerous modified nucleotides in eukaryotic ribosomal RNA. *Biochimie.* 1995;77(1-2):22–9.
  15. The 1000 Genomes Project Consortium. A global reference for human genetic variation. *Nature.* 2015 Oct 1;526(7571):68–74.
  16. Shi Z, Barna M. Translating the genome in time and space: specialized ribosomes, RNA regulons, and RNA-binding proteins. *Annu Rev Cell Dev Biol.* 2015;31:31–54.
  17. Dinman JD. Pathways to Specialized Ribosomes: The Brussels Lecture. *J Mol Biol.* 2016 May 22;428(10 Pt B):2186–94.
  18. Kondrashov N, Pusic A, Stumpf CR, Shimizu K, Hsieh AC, Xue S, et al. Ribosome-mediated specificity in Hox mRNA translation and vertebrate tissue patterning. *Cell.* 2011 Apr 29;145(3):383–97.
  19. Xue S, Tian S, Fujii K, Kladwang W, Das R, Barna M. RNA regulons in Hox 5' UTRs confer ribosome specificity to gene regulation. *Nature.* 2015 Jan 1;517(7532):33–8.
  20. Slavov N, Semrau S, Airoidi E, Budnik B, van Oudenaarden A. Differential Stoichiometry among Core Ribosomal Proteins. *Cell Rep.* 2015 Oct 22;13(5):865–73.
  21. Yadav A, Radhakrishnan A, Panda A, Singh A, Sinha H, Bhanot G. The Modular Adaptive Ribosome. *PLOS ONE.* 2016 Nov 3;11(11):e0166021.
  22. Guimaraes JC, Zavolan M. Patterns of ribosomal protein expression specify normal and malignant human cells. *Genome Biol [Internet].* 2016 Nov 24 [cited 2017 Mar 17];17. Available from: <http://www.ncbi.nlm.nih.gov/pmc/articles/PMC5123215/>
  23. Krogh N, Jansson MD, Häfner SJ, Tehler D, Birkedal U, Christensen-Dalsgaard M, et al. Profiling of 2'-O-Me in human rRNA reveals a subset of fractionally modified positions and provides evidence for ribosome heterogeneity. *Nucleic Acids Res.* 2016 Sep 19;44(16):7884–95.
  24. Nakhoul H, Ke J, Zhou X, Liao W, Zeng SX, Lu H. Ribosomopathies: Mechanisms of Disease. *Clin Med Insights Blood Disord.* 2014 Aug 14;7:7–16.



25. Prezant TR, Agapian JV, Bohlman MC, Bu X, Öztas S, Qiu W-Q, et al. Mitochondrial ribosomal RNA mutation associated with both antibiotic-induced and non-syndromic deafness. *Nat Genet.* 1993 Jul;4(3):289-94.
26. Petrov AS, Bernier CR, Hsiao C, Norris AM, Kovacs NA, Waterbury CC, et al. Evolution of the ribosome at atomic resolution. *Proc Natl Acad Sci U S A.* 2014 Jul 15;111(28):10251-6.
27. Bernier CR, Petrov AS, Waterbury CC, Jett J, Li F, Freil LE, et al. RiboVision suite for visualization and analysis of ribosomes. *Faraday Discuss.* 2014;169:195-207.
28. Langmead B, Salzberg SL. Fast gapped-read alignment with Bowtie 2. *Nat Methods.* 2012 Apr;9(4):357-9.
29. McKenna A, Hanna M, Banks E, Sivachenko A, Cibulskis K, Kernytzsky A, et al. The Genome Analysis Toolkit: a MapReduce framework for analyzing next-generation DNA sequencing data. *Genome Res.* 2010 Sep;20(9):1297-303.
30. Li H. A statistical framework for SNP calling, mutation discovery, association mapping and population genetical parameter estimation from sequencing data. *Bioinforma Oxf Engl.* 2011 Nov 1;27(21):2987-93.
31. Knaus BJ, Grunwald NJ. VcfR: an R package to manipulate and visualize VCF format data. *bioRxiv.* 2016 Feb 26;041277.
32. Gibbons JG, Branco AT, Godinho SA, Yu S, Lemos B. Concerted copy number variation balances ribosomal DNA dosage in human and mouse genomes. *Proc Natl Acad Sci U S A.* 2015 Feb 24;112(8):2485-90.

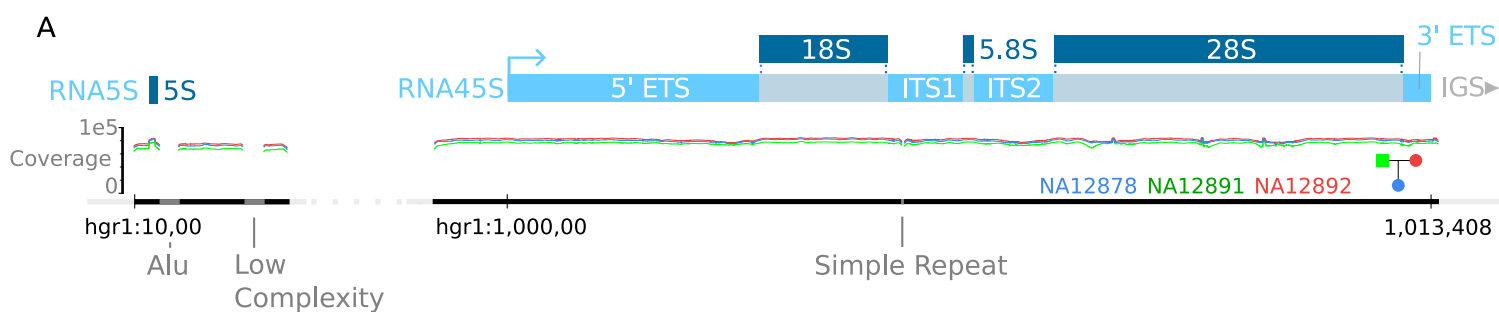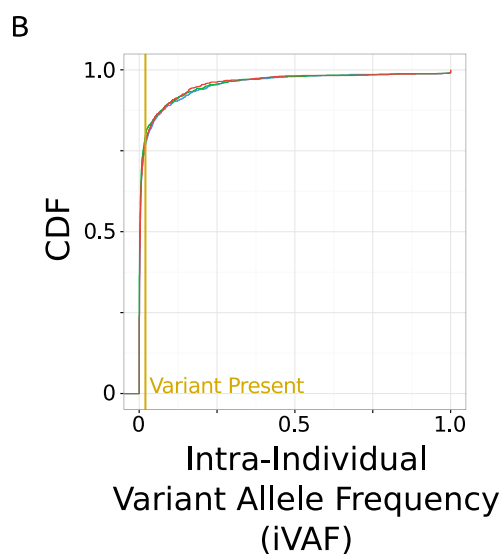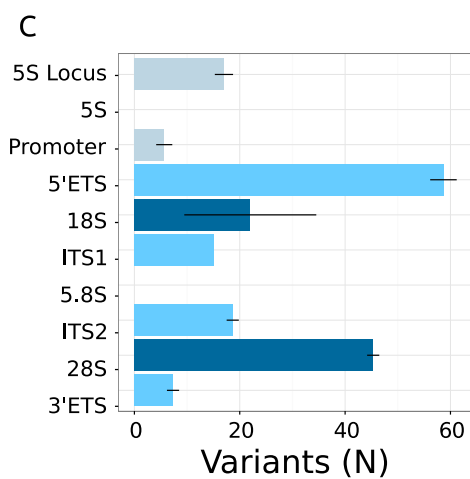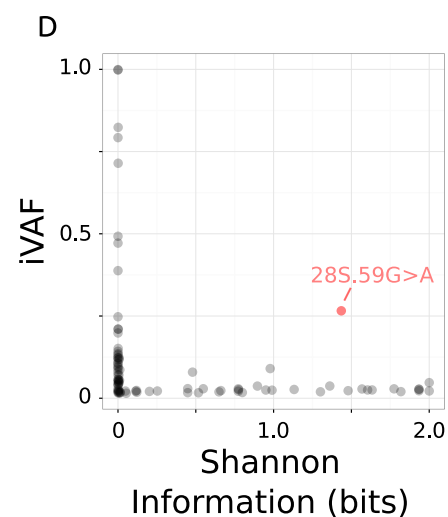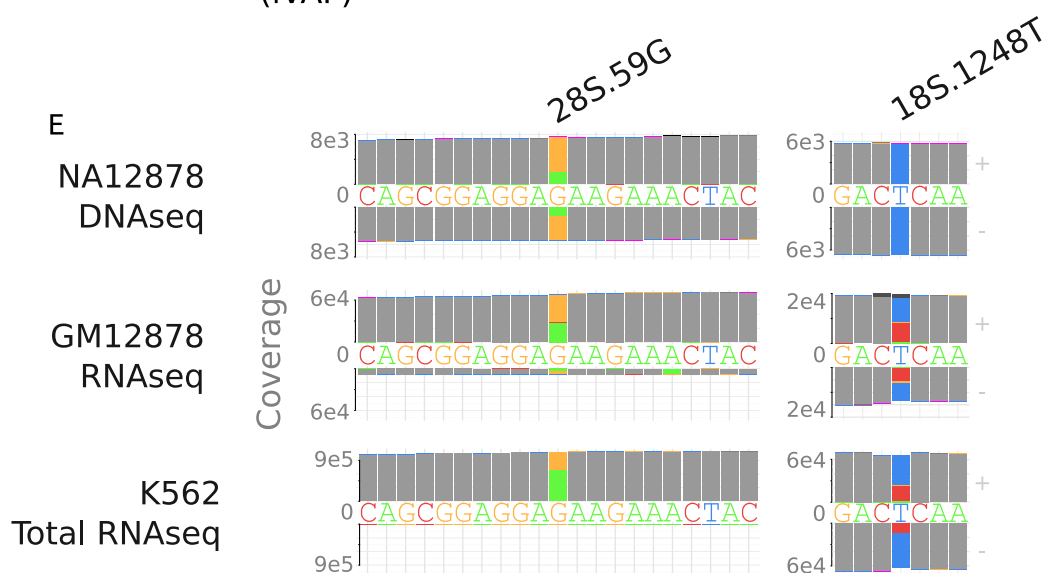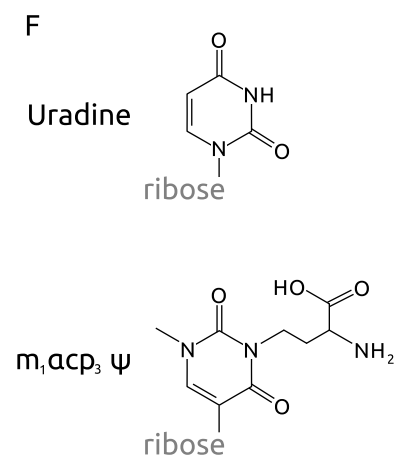

## Figure 1: Intra-individual variation at the rDNA locus

A) Map of the *hgr1* reference sequence used in this study. It includes a single repeat of the entire *RNA5S* locus and *RNA45S* with adjacent sequences. In each locus a simple-repeats and a AluY were N-masked. *RNA45S* can be subdivided into the 5' and 3' external transcribed spacer (ETS), internal transcribed spacer (ITS) 1 and 2, and the mature rRNAs. Downstream of each *RNA45S* is a 29.6kb intergenic spacer (IGS) which was not included in this study. B) Log-scaled coverage across *hgr1* in the CEPH-1463 trio. C) The cumulative distribution of intra-individual variant allele frequency of the 926 variant positions (see materials and methods) for each member of the trio. The yellow vertical line at iVAF = 0.02 is the threshold at which a variant was called as 'present' in an individual. D) The average distribution of variants (iVAF > 0.02) in each region of *hgr1*. E) Evolutionary conservation (in Shannon Information bits(26)) of the mature rRNA variants relating to the intra-individual variant allele frequency. F) Detailed coverage of NA12878 DNA- and poly-A selected RNA-seq, as well as K562 total RNA-seq at 28S.59G and 18S.1248T. The read coverage matching the reference sequence is colored in gray and mis-matching sequences are colored by the alternative base. E) The structure of i) uradine and ii) the hyper-modified nucleotide 1-methyl-3-( $\alpha$ -amino- $\alpha$ -carboxyl-propyl) Psuedouridine.

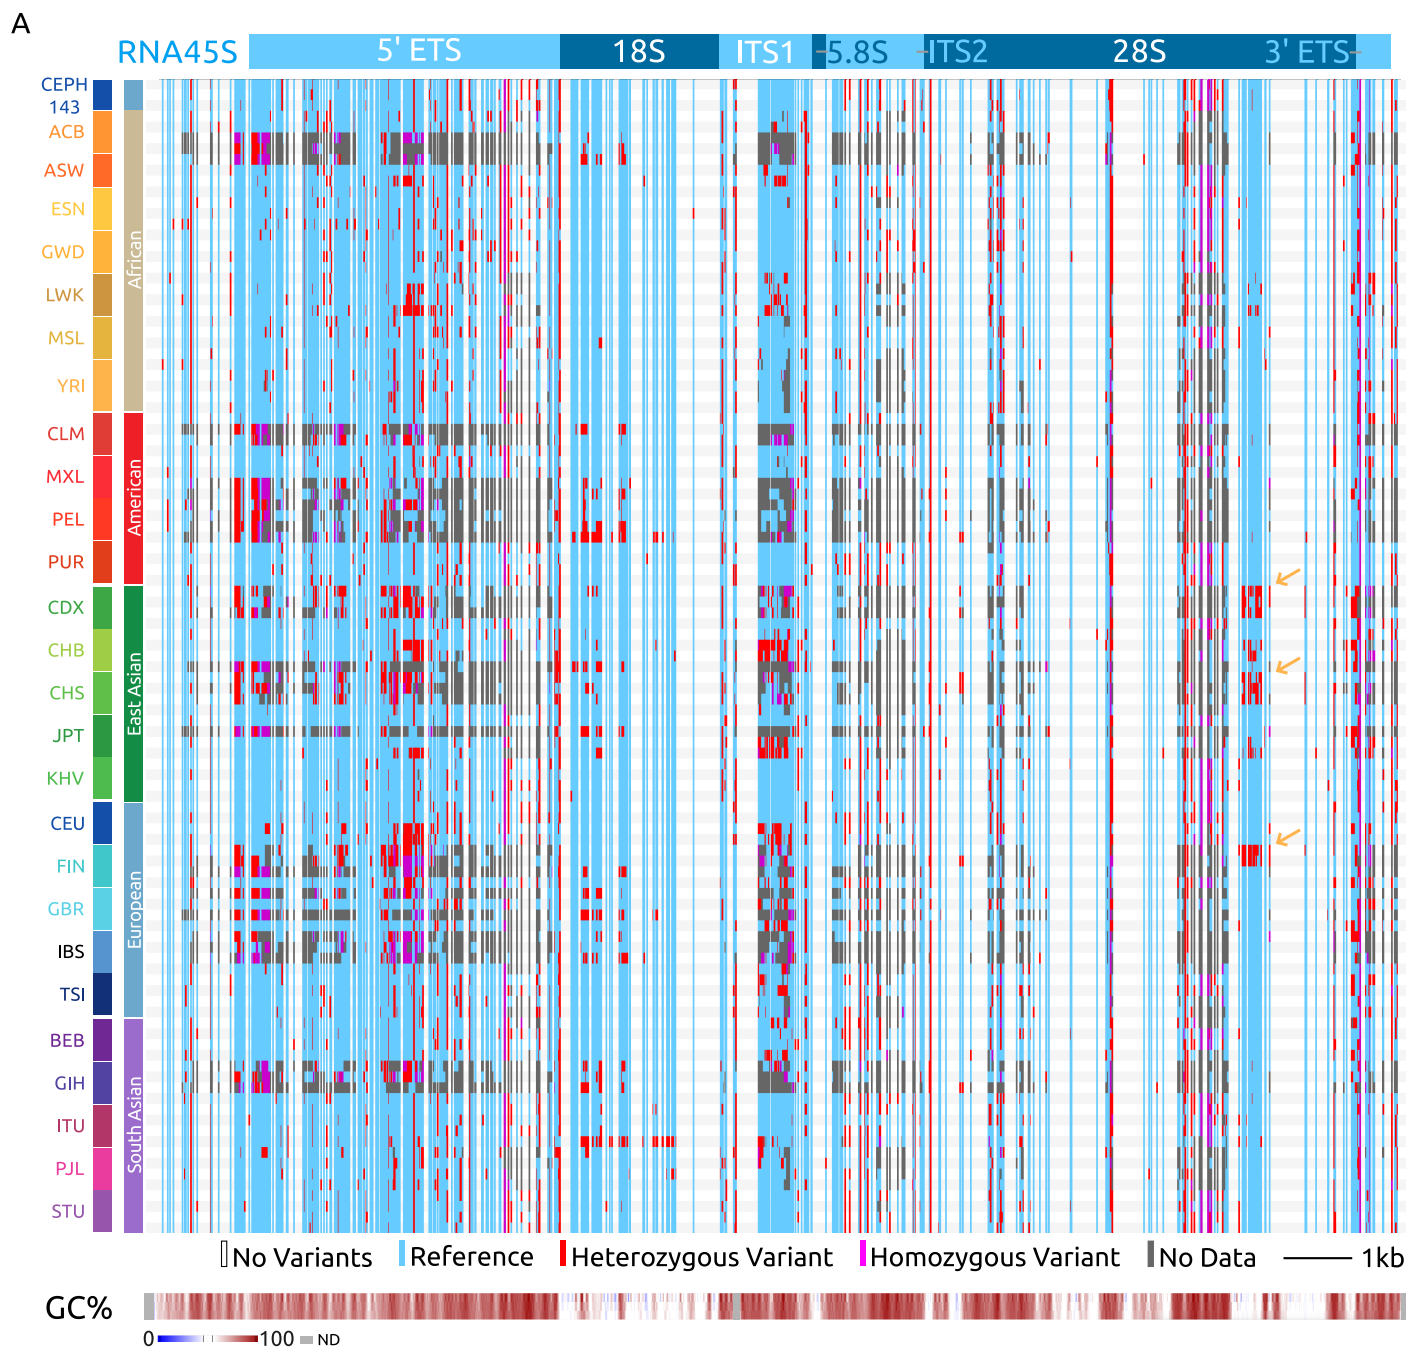

**B i.**

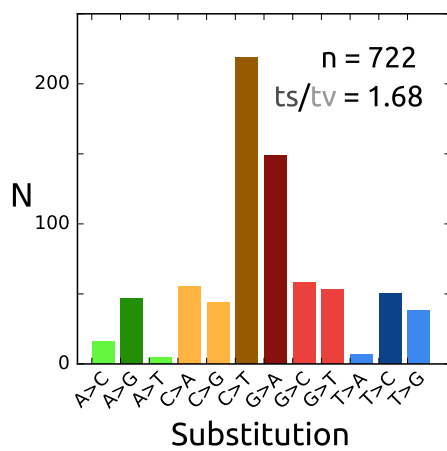

**ii.**

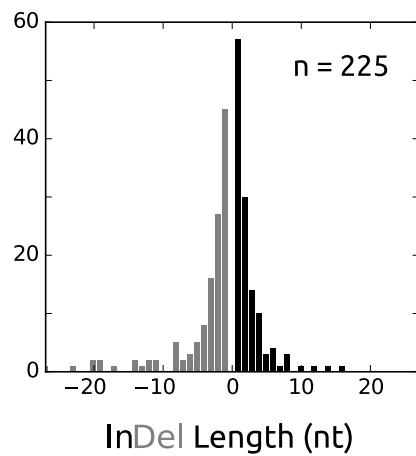

**C**

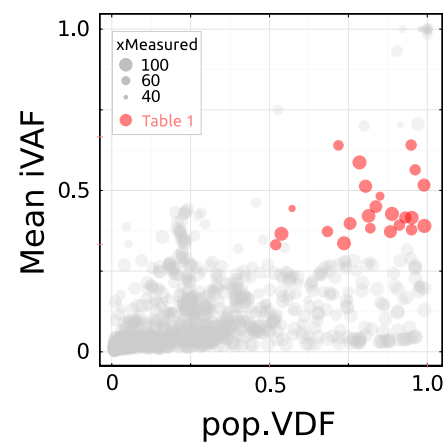

## Figure 2: Inter-individual variation at *RNA45S*

A) Visualization of the high-quality variants from 107 individuals from 26 world populations. Vertical blue lines are sequences in which a variant genotype was called in at least one genome, with heterozygous and homozygous genotyping in red and magenta respectively. Invariable positions are clear columns across the whole graph. Particular libraries in which there was no quality coverage at a variant is gray. Sequence GC% is shown at the bottom in 30, 50 and 70 bp sliding windows. F) Transition vs. transversion nucleotide substitutions in the 722 single-nucleotide variants. E) Size distribution of the 225 indel variants.

305 D) Inter-individual, or population variant-detection frequency (pVDF) vs. Intra-individual variant allele frequency (iVAF) scaled by the number of distinct genomes in which the variant allele was measured (to account for regions of uneven read coverage in the data). Red highlighted variants have an average intra-individual allele frequency between 0.33 - 0.66 and are found in at least half

310 of the genomes interrogated (see Table 1).

## Supplementary Files

### Supplementary Table 1. *Supplementary\_Table1.xls*

Sequencing datasets and their accessions used in this study.

### Supplementary Sequence 1. *hgr1.fa.gz*

315 Hgr1 reference rDNA sequence. Deposition into online nucleotide database pending.

### Supplementary File 1: *107genomes.hgr1.g.vcf.gz*

GVCF file of the 926 variants positions in the 107 genomes included in this study.
